# Supplementary material for: Solvothermal synthesis of two unique metal–organic frameworks: a 3-fold interpenetrating (3,4,5)-connected network and a 2-fold interpenetrating (4,5)-connected network
Source: Royal Society of Chemistry journal article supplement (doi:10.1039/b912158g), 2009-10-01
Supplement: b912158g.pdf [file b912158g.pdf]

*Electronic Supplementary Information*

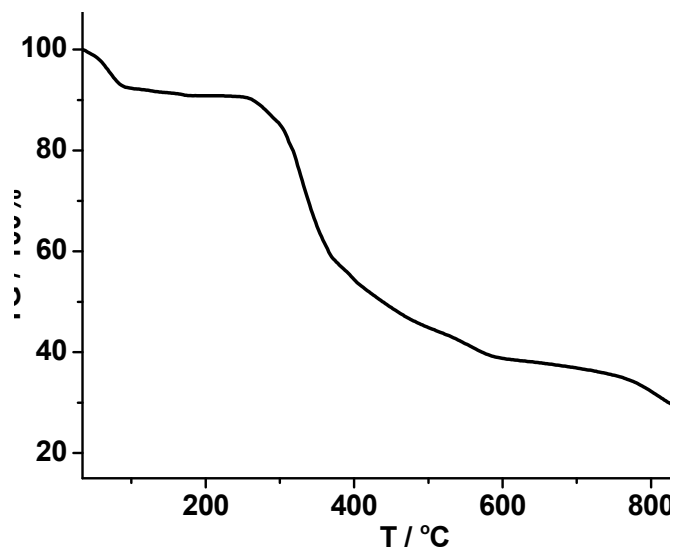

(a)

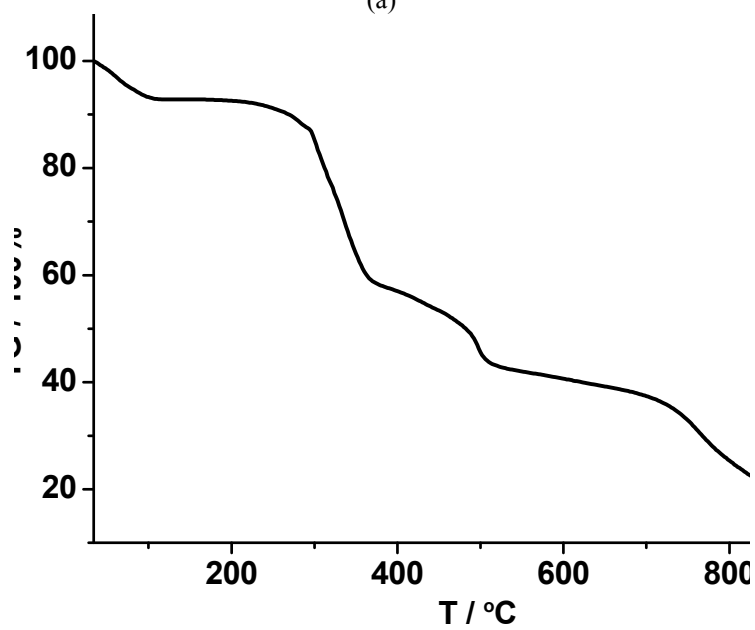

(b)

**Fig. S1** TGA curves for 1 and 2.

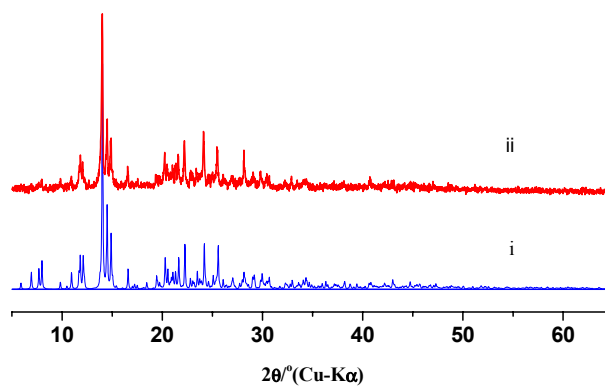

(a)

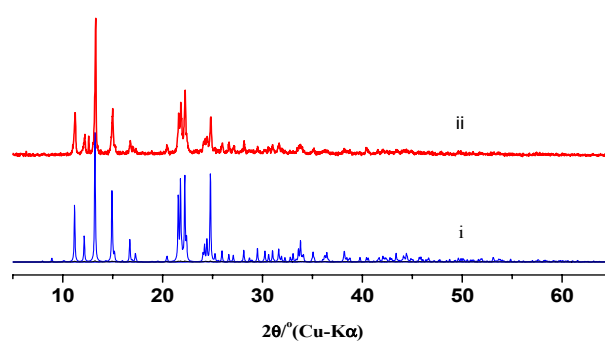

(b)

**Fig. S2** Simulated (i) and experimental (ii) X-ray powder diffraction patterns of **1(a)** and **2(b)**.
